# Supplementary material
Source: HighWire-hosted journal article supplement (https://bmjopen.bmj.com/content/11/5/e041581)
Supplement: inline-supplementary-material-1 [file inline-supplementary-material-1.pdf]

Database: Ovid MEDLINE(R) In-Process & Other Non-Indexed Citations and Ovid MEDLINE(R)  
<1946 to Present>

Search Strategy:

- 
- 1 Return to Work/ (929)
  - 2 Employment, Supported/ (965)
  - 3 Work/ (18878)
  - 4 Employment/ (39799)
  - 5 Unemployment/ (5713)
  - 6 Occupations/ (21163)
  - 7 Workplace/ (15989)
  - 8 Occupational Medicine/ (23036)
  - 9 Occupational Health/ (28115)
  - 10 Occupational Health Services/ (10004)
  - 11 Sick Leave/ (4524)
  - 12 Absenteeism/ (7929)
  - 13 (return\* adj3 (work\* or dut\*)).tw,kw. (9843)
  - 14 (employable or employee\* or employment or unemployment or unemployed).tw,kw. (85298)
  - 15 (sick leave\* or sickness\* or absence\* or absenteeism).tw,kw. (538140)
  - 16 ("disability management" or "disability prevention").tw,kw. (450)
  - 17 (occupation or occupations or vocation or vocations).tw,kw. (31579)
  - 18 (employability or employable or employee\*).tw,kw. (36230)
  - 19 ("work\* adj2 abilit\*" or ('work\* adj2 capacity\*') or ('work\* adj2 activit\*') or ('work adj2 disability\*') or ('work\* adj2 rehab\*') or ('work\* adj2 status\*') or ('work\* adj2 retention\*') or (work\* adj2 sustain\*) or (work adj2 maintain\*) or workabilit\*).tw,kw. (22653)
  - 20 or/1-19 (781782)
  - 21 Disability Evaluation/ (39236)
  - 22 exp Self-Help Devices/ (9342)
  - 23 "Equipment and Supplies"/ (22368)
  - 24 (case manager or case management).tw,kw. (9233)
  - 25 (disab\* adj3 guidance).tw,kw. (23)

- 26 (assistive adj3 (device\* or technolog\* or self-help)).tw,kw. (2812)
- 27 (self help adj3 device\*).tw,kw. (64)
- 28 Work Capacity Evaluation/ (5423)
- 29 Vocational Guidance/ (2040)
- 30 (vocational adj3 (training\* or placement\* or counseling)).tw,kw. (1818)
- 31 ((work\* or job? or jobsite\* or occupation\* or employ\*) adj5 interven\*).tw,kw. (11855)
- 32 ((work\* or job? or jobsite\* or occupation\* or employ\*) adj5 accomod\*).tw,kw. (22)
- 33 ((work\* or job? or jobsite\* or occupation\* or employ\*) adj5 modif\*).tw,kw. (7043)
- 34 ((work\* or job? or jobsite\* or occupation\* or employ\*) adj5 adjust\*).tw,kw. (5420)
- 35 ((work\* or job? or jobsite\* or occupation\* or employ\*) adj5 visit\*).tw,kw. (3035)
- 36 ((work\* or job? or jobsite\* or occupation\* or employ\*) adj5 evaluat\*).tw,kw. (32035)
- 37 ((work\* or job? or jobsite\* or occupation\* or employ\*) adj5 access\*).tw,kw. (4463)
- 38 (reduced adj3 (employ\* or occupation\* or work\* or duty or duties)).tw,kw. (3484)
- 39 (vocational adj3 guidance).tw,kw. (195)
- 40 (ergonomic adj3 (intervention? or counsel\* or education or training or approach\*)).tw,kw. (606)
- 41 ((light or modified or graded or alternative) adj3 (duty or duties or work\*)).tw,kw. (4152)
- 42 or/21-41 (154976)
- 43 exp brain injuries/ (55732)
- 44 Craniocerebral Trauma/ (20483)
- 45 exp Head Injuries, Closed/ (8476)
- 46 exp Skull Fractures/ (19769)
- 47 mTBI\*2.tw,kw. (1415)
- 48 tbi\*2.tw,kw. (18022)
- 49 wrTBI\*2.tw,kw. (8)
- 50 concuss\*.tw,kw. (5252)
- 51 ((head\* or cerebr\* or crani\* or capitis\* or brain\* or forebrain\* or skull\* or hemispher\* or intracran\* or orbit\*) adj2 (injur\* or trauma\* or lesion\* or damag\* or wound\* or destruction\* or swell\* or oedema\* or edema\* or fracture\* or contusion\* or commotion\* or pressur\*)).tw,kw. (158249)

52 ((brain\* or cerebr\* or intracerebr\* or crani\* or intracran\* or head\* or subarachnoid\* or subdural\* or epidural\* or extradural\*) adj2 (haematoma\* or hematoma\* or hemorrhag\* or haemorrhag\* or pressur\* or bleed\*)).tw,kw. (76249)

53 or/43-52 (247310)

54 20 and 42 and 53 (440)

55 limit 54 to english language (369)

56 exp animals/ not (exp animals/ and exp humans/) (4244639)

57 55 not 56 (366)

58 (exp child/ or exp infant/) not ((exp child/ or exp infant/) and exp adult/) (1462717)

59 57 not 58 (361)
